# Supplementary material for: External validation of IBTR! 2.0 nomogram for prediction of ipsilateral breast tumor recurrence
Source: PubMed Central journal article supplement — Radiat Oncol J. 2018 Jun 29;36(2):139–46. doi: 10.3857/roj.2018.00059 (PMC6074074; doi:10.3857/roj.2018.00059), 2018-06-29
Supplement: roj-2018-00059-suppl1.pdf [file roj-2018-00059-suppl1.pdf]

**Table S1.** Kaplan-Meier estimated 10-year OS and DFS

| Variables                  | Univariate analysis |         |               |         |
|----------------------------|---------------------|---------|---------------|---------|
|                            | 10-yr OS (%)        | p-value | 10-yr DFS (%) | p-value |
| Age (yr) (as median value) |                     | 0.095   |               | 0.341   |
| <49                        | 95.7                |         | 93.1          |         |
| ≥49                        | 93.9                |         | 92.2          |         |
| pT stage                   |                     | 0.006   |               | 0.002   |
| T3-4                       | 91.9                |         | 89.9          |         |
| T1-2                       | 96.0                |         | 94.2          |         |
| pN stage                   |                     | 0.007   |               | 0.001   |
| N +                        | 93.0                |         | 89.7          |         |
| N0                         | 95.4                |         | 94.0          |         |
| Location                   |                     | 1.448   |               | 0.107   |
| Inner                      | 93.3                |         | 92.5          |         |
| Outer and central          | 95.7                |         | 93.7          |         |
| Tumor grade                |                     | 0.006   |               | 0.014   |
| 3                          | 92.3                |         | 90.7          |         |
| 2                          | 95.0                |         | 92.9          |         |
| 1                          | 98.5                |         | 95.6          |         |
| Resection margin           |                     | 0.185   |               | 0.276   |
| Positive                   | 90.7                |         | 88.0          |         |
| Close                      | 91.7                |         | 91.7          |         |
| Negative                   | 95.1                |         | 93.6          |         |
| Lymphovascular invasion    |                     | 0.024   |               | 0.055   |
| Positive                   | 87.2                |         | 89.8          |         |
| Negative                   | 95.8                |         | 93.7          |         |
| Chemotherapy               |                     | 0.284   |               | 0.057   |
| Yes                        | 94.2                |         | 92.5          |         |
| No                         | 96.4                |         | 95.3          |         |
| Hormone therapy            |                     | 0.428   |               | 0.626   |
| Yes                        | 94.9                |         | 93.6          |         |
| No                         | 94.7                |         | 93.4          |         |

OS, overall survival; DFS, disease-free survival; CI, confidence interval.
