# Supplementary material for: External validation of IBTR! 2.0 nomogram for prediction of ipsilateral breast tumor recurrence
Source: PubMed Central journal article supplement — Radiat Oncol J. 2018 Jun 29;36(2):139–46. doi: 10.3857/roj.2018.00059 (PMC6074074; doi:10.3857/roj.2018.00059), 2018-06-29
Supplement: roj-2018-00059-suppl2.pdf [file roj-2018-00059-suppl2.pdf]

**Table S2.** Multivariable regression analysis of overall survival and disease-free survival

| Variable                | Overall survival |         | Disease-free survival |         |
|-------------------------|------------------|---------|-----------------------|---------|
|                         | HR (95% CI)      | p-value | HR (95% CI)           | p-value |
| pT stage                |                  |         |                       |         |
| T3-4                    | 1.45 (0.89-2.36) | 0.136   | 1.37 (0.95-1.97)      | 0.092   |
| T1-2                    | 1 (reference)    |         | 1 (reference)         |         |
| pN stage                |                  |         |                       |         |
| N positive              | 1.69 (1.03-2.75) | 0.037   | 1.70 (1.18-2.44)      | 0.004   |
| N0                      | 1 (reference)    |         | 1 (reference)         |         |
| Tumor grade             |                  | 0.034   |                       | 0.116   |
| 3                       | 2.61 (1.26-5.40) | 0.01    | 1.36 (0.87-2.13)      | 0.173   |
| 2                       | 2.09 (1.06-4.11) | 0.032   | 1.68 (1.03-2.74)      | 0.038   |
| 1                       | 1 (reference)    |         | 1 (reference)         |         |
| Lymphovascular invasion |                  |         |                       |         |
| Positive                | 1.48 (0.69-3.18) | 0.305   | Not included          |         |
| Negative                | 1 (reference)    |         |                       |         |

HR, hazard ratio; CI, confidence interval.
